# Supplementary material for: Maximizing liposome tumor delivery by hybridizing with tumor-derived extracellular vesicles
Source: Royal Society of Chemistry journal article supplement (doi:10.1039/d4nr02191f), 2024-01-01
Supplement: d4nr02191f1.pdf [file d4nr02191f1.pdf]

Maximizing liposome tumor delivery by hybridizing with tumor-derived extracellular vesicles

Shoukath Sulthana, Dinesh Shrestha, Santosh Aryal\*

Department of Pharmaceutical Sciences and Health Outcomes, The Ben and Maytee Fisch College of Pharmacy, University of Texas at Tyler, Tyler, TX 75799

\* Corresponding author: [santosharyal@uttyler.edu](mailto:santosharyal@uttyler.edu)

| Sample    | Angle of Detection |      |             |      |             |       | Zeta Potential (mV) | Particle concentration (number/mL) |
|-----------|--------------------|------|-------------|------|-------------|-------|---------------------|------------------------------------|
|           | 17°                |      | 90°         |      | 173°        |       |                     |                                    |
|           | Size (d.nm)        | PDI  | Size (d.nm) | PDI  | Size (d.nm) | PDI   |                     |                                    |
| EVs       | 102±4              | 1    | 23±05       | 0.22 | 10-150      | 0.39  | -15±0.3             | 1.588 x 10 <sup>8</sup>            |
| LEVs      | 319±5              | 0.08 | 109±4       | 0.14 | 140±5       | 0.145 | -36±0.6             | 2.73 x 10 <sup>11</sup>            |
| Liposomes | 134±6              | 0.26 | 123±8       | 0.13 | 106±1       | 0.105 | -31±0.8             | 8.932 x 10 <sup>10</sup>           |

**Figure S1.** Physiochemical characterization of extracellular vesicles (EVs) derived from mouse breast cancer 4T1 cell using multi-angle dynamic light scattering at three different angles.

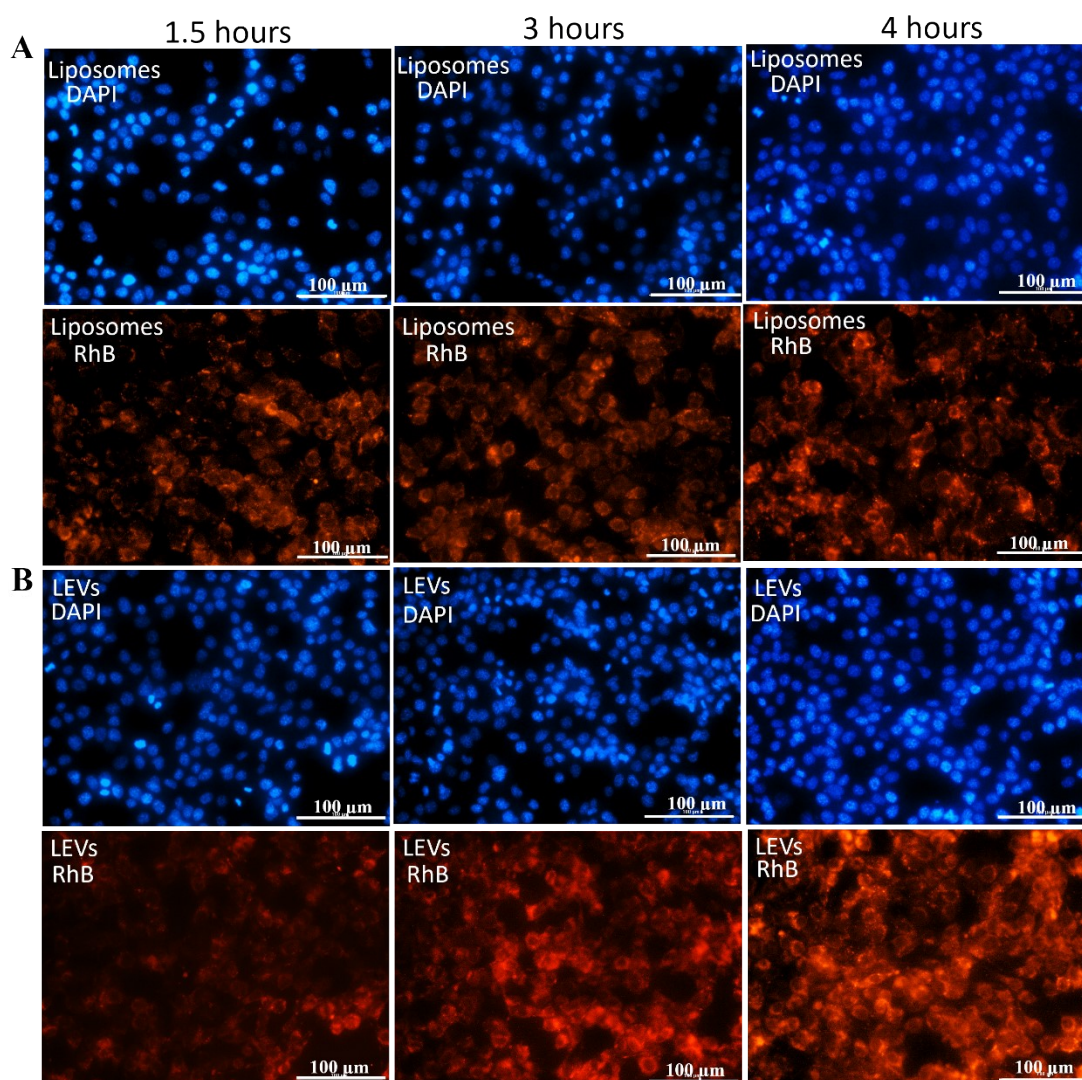

**Figure S2.** Cellular internalization studies: Fluorescence images showing cellular internalization of RhB labelled liposomes (A) and LEVs (B) after 1.5 h, 3 h, and 4 h incubation. Results showed minimal internalizations of control liposomes and maximum internalization of LEVs into 4T1 cells.

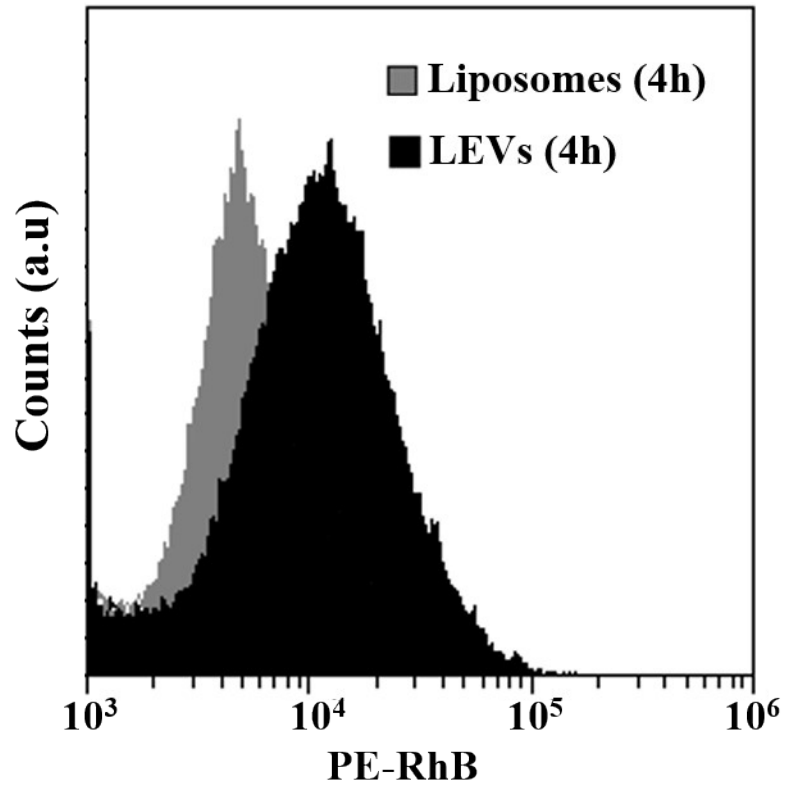

**Figure S3.** Flow cytometry graphs of cellular internalization by mouse breast cancer (4T1) cells after incubation with Rh-B labeled liposome and LEVs (100 ug/mL feed) for 4 h time. Data represent mean  $\pm$  SD, n = 3.
